# Supplementary material for: Renal subcapsular delivery of PGE2 promotes kidney repair by activating endogenous Sox9+ stem cells
Source: PubMed Central journal article supplement (PMC8554536; doi:10.1016/j.isci.2021.103243), 2021-10-08
Supplement: mmc1.pdf [file mmc1.pdf]

**Supplemental information**

**Renal subcapsular delivery of PGE<sub>2</sub> promotes kidney repair  
by activating endogenous Sox9<sup>+</sup> stem cells**

**Shang Chen, Haoyan Huang, Yue Liu, Chen Wang, Xiaoniao Chen, Yuqiao Chang, Yuhao Li, Zhikun Guo, Zhibo Han, Zhong-Chao Han, Qiang Zhao, Xiang-Mei Chen, and Zongjin Li**

## Supplemental information

### Renal subcapsular delivery of PGE<sub>2</sub> promotes kidney repair by activating endogenous Sox9<sup>+</sup> stem cells

Shang Chen, Haoyan Huang, Yue Liu, Chen Wang, Xiaoniao Chen, Yuqiao Chang, Yuhao Li, Zhikun Guo, Zhibo Han, Zhong-Chao Han, Qiang Zhao, Xiang-Mei Chen, and Zongjin Li

## SUPPLEMENTAL INFORMATION

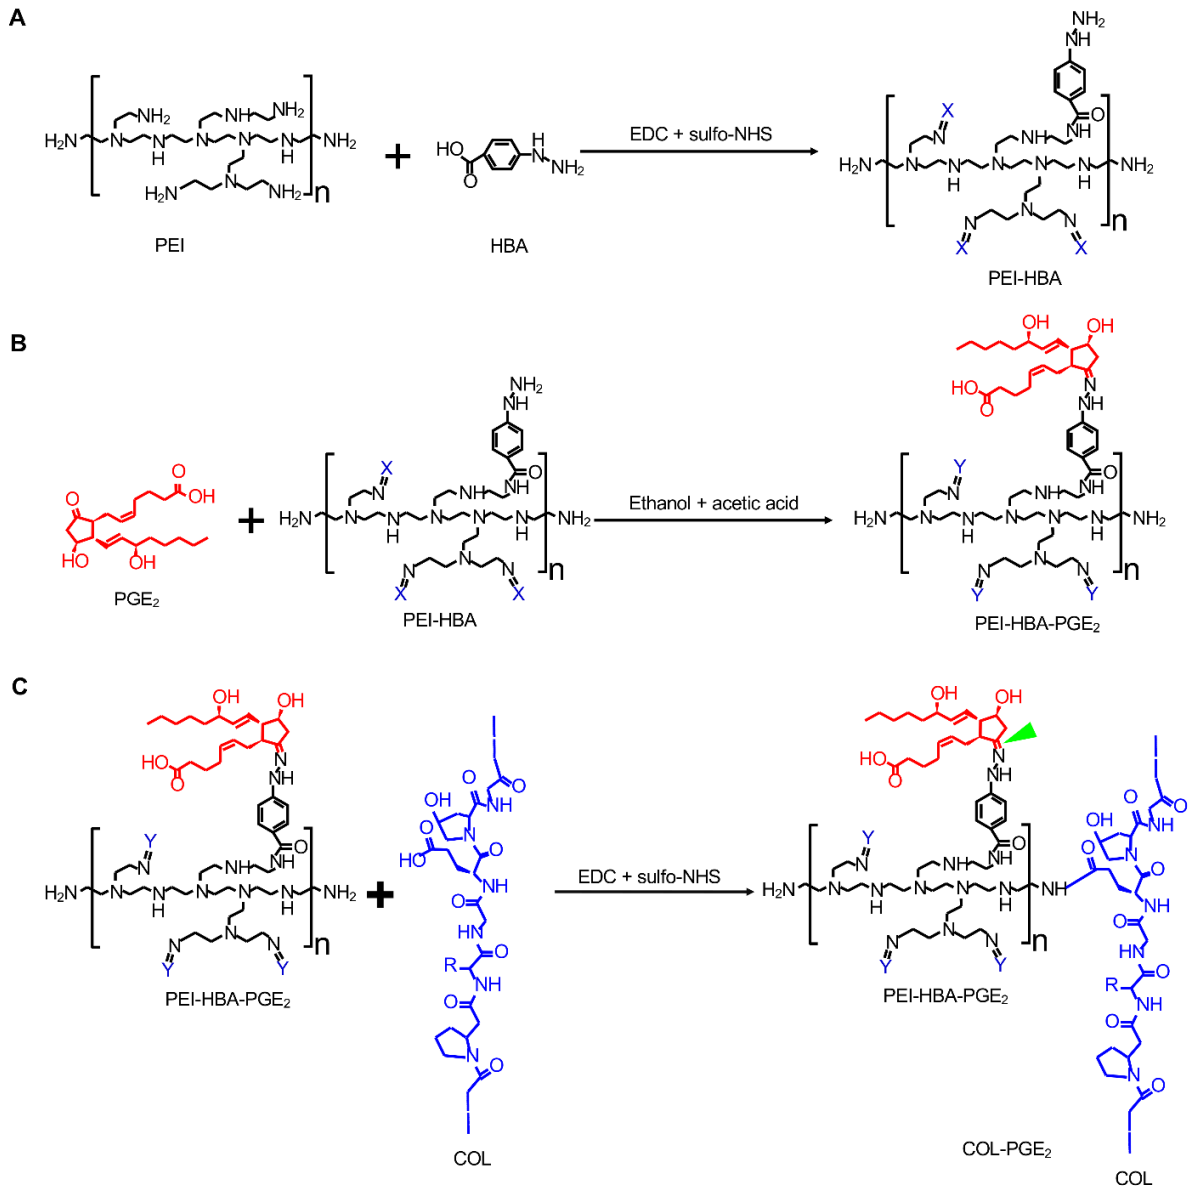

**Figure S1. A schematic depicting the method of synthesis of the COL-PGE<sub>2</sub> matrix. (A)** The PEI-HBA conjugates were synthesized by the dehydration condensation reaction between the amine group on PEI and the carboxylic group on HBA. **(B)** The ketone group on PGE<sub>2</sub> was reacted with the hydrazine group on PEI-HBA to synthesize the PEI-HBA-PGE<sub>2</sub> conjugates through a dehydration reaction. **(C)** The PEI-HBA-PGE<sub>2</sub> conjugates and collagen were further crosslinked by using dehydration condensation. Mechanism of PGE<sub>2</sub> release: The breakage sites of PGE<sub>2</sub> covalently attached (red) to branched PEI-HBA (black) and collagen (blue) are indicated by green arrows. X= hydrogen or HBA; Y = hydrogen, HBA or HBA-PGE<sub>2</sub>. Abbreviations: HBA, 4-hydrazinobenzoic acid; PEI, polyethylenimine.

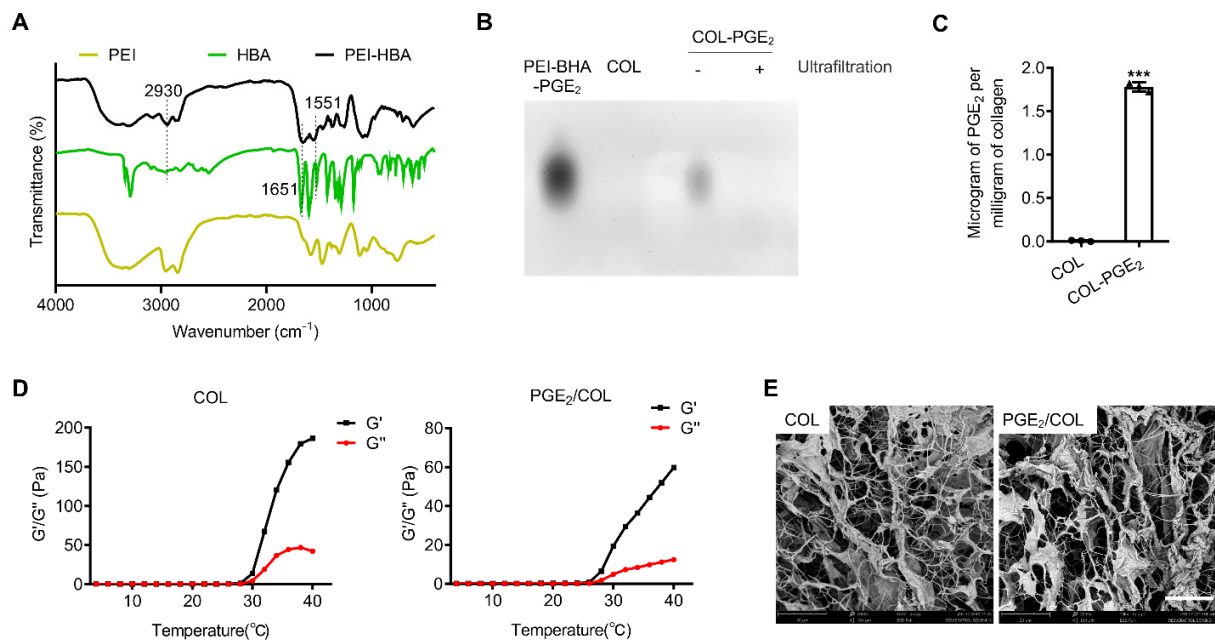

**Figure S2. Characterization of collagen and the PGE<sub>2</sub>/COL matrix.** (A) FT-IR analysis shows the characteristic peaks of PEI, HBA, and PEI-HBA. (B) Tris-borate-EDTA-PAGE was used to detect free PEI-HBA-PGE<sub>2</sub>. (C) Quantification of PGE<sub>2</sub> in collagen before and after crosslinking as determined using ELISA. Results are normalized to collagen concentration and expressed as the content of PGE<sub>2</sub> per milligram of collagen. The two-tailed *t* test was used for statistical analysis. Data are expressed as mean ± SD; \*\*\**P* < 0.001 versus COL. The experiments were carried out in triplicate. (D) Evaluation of the rheologic profile of collagen (left) and the PGE<sub>2</sub>/COL matrix (right) during temperature changes. (E) Scanning electron micrograph image that reveals the morphologic structure of lyophilized collagen (left) and the PGE<sub>2</sub>/COL matrix (right). Scale bars, 30 μm.



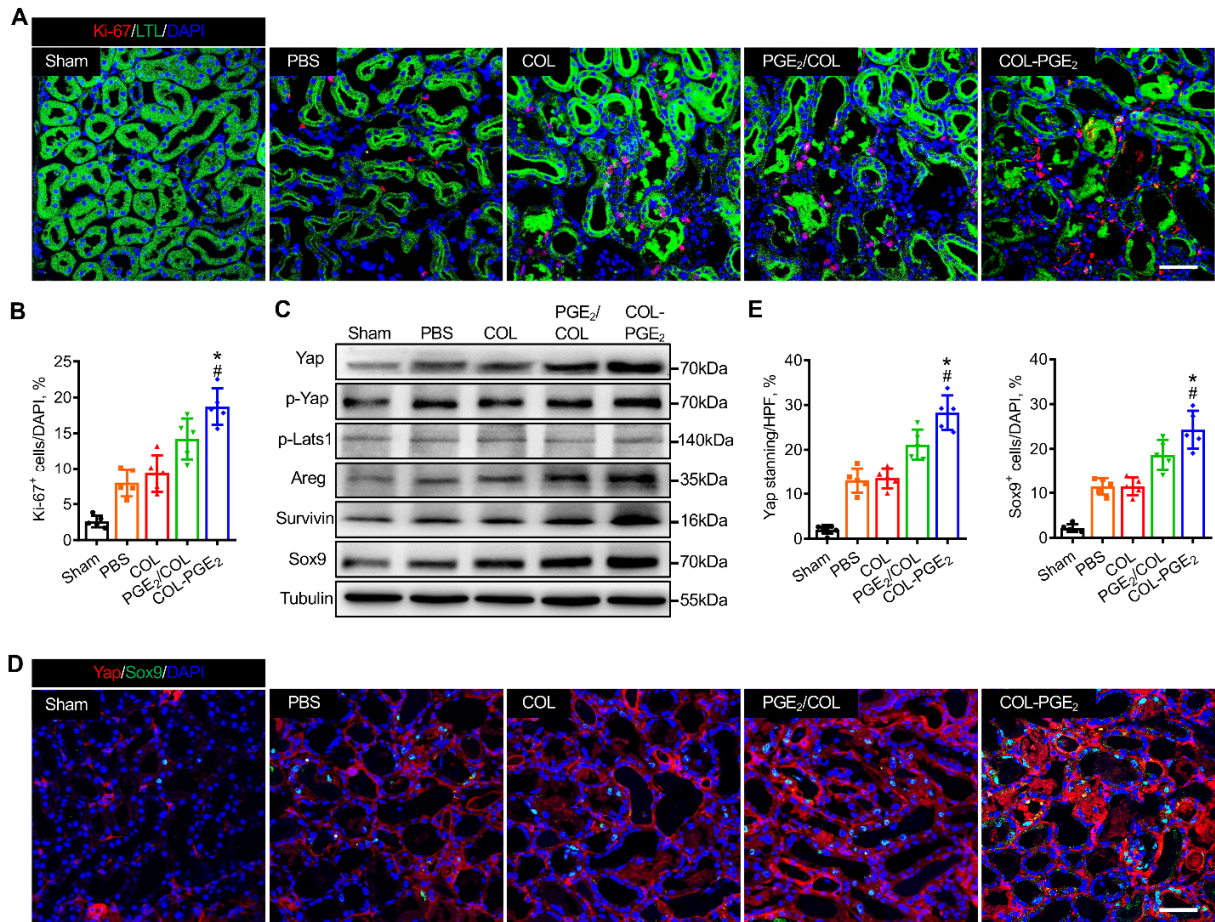

**Figure S3. COL-PGE2 promoted the proliferation of proximal tubular epithelial cells and the activation of Sox9 through Yap mediation.** (A) Representative images show Ki-67 immunostaining (red) detected in proximal tubular epithelial cells (LTL, green) on day 3 after AKI. (B) Quantification of Ki-67<sup>+</sup> staining in (A). (C) Immunoblot analysis of the YAP, p-YAP, p-Lats1, Areg, Survivin, and Sox9 protein in the kidney on day 3 of PBS, COL, PGE<sub>2</sub>/COL and COL-PGE<sub>2</sub>. (D) Immunostaining analysis of YAP (red) and Sox9 (green) on day 3 after AKI. (E) Quantification of YAP<sup>+</sup> (left) and Sox9<sup>+</sup> (right) staining. HPF, high-power field. Scale bars, 50  $\mu$ m. One-way repeated measures ANOVA with Tukey post hoc tests (B and E) was used for statistical analysis. Data are expressed as mean  $\pm$  SD; n=5, \* $P$  < 0.05 versus COL; # $P$  < 0.05, versus PGE<sub>2</sub>/COL.

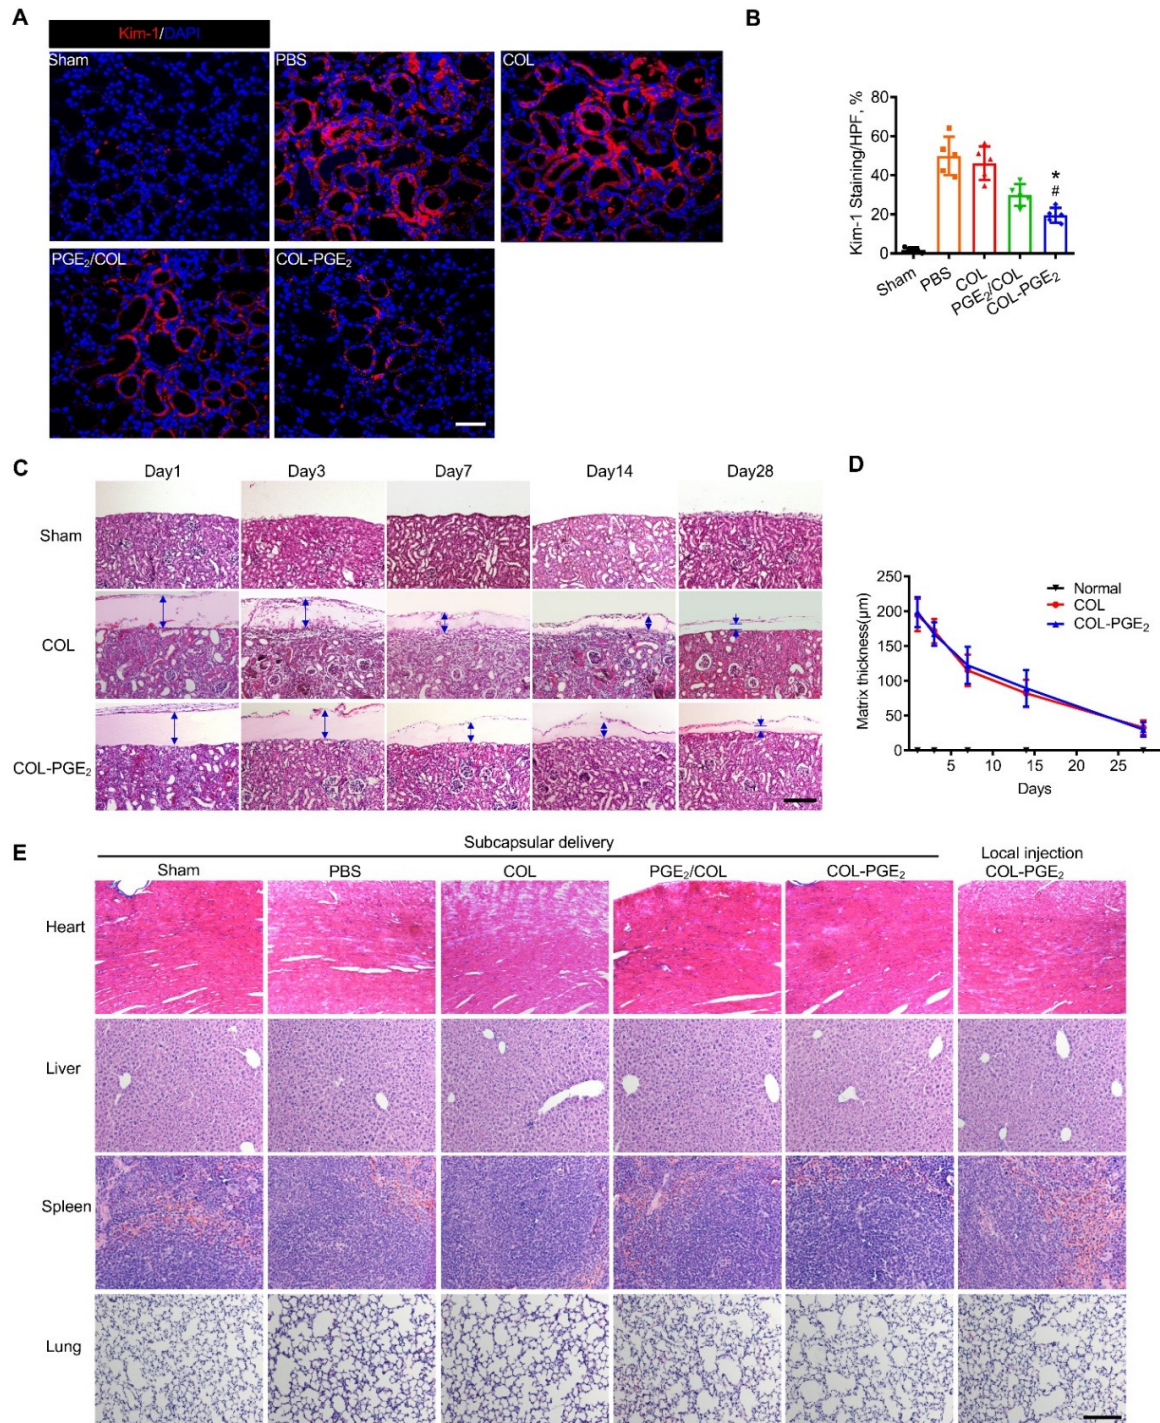

**Figure S4. The COL-PGE<sub>2</sub> matrix attenuates kidney injury without organ toxicity.** (A) Histological analysis of kidney injury by anti-Kim-1 immunostaining (red) on day 3 post AKI. Scale bars, 50  $\mu$ m. (B) Quantification of Kim-1<sup>+</sup> staining. (C) Analysis of the matrix degradation profile by measuring the thickness of the matrix under the kidney capsules on day 1, 3, 7, 14, 28 post AKI. Scale bars, 200  $\mu$ m. (D) Quantification of the thickness of the matrix. (E) H&E staining did not show histological changes in the heart, liver, spleen and lung. One-way repeated measures ANOVA with a Tukey post hoc test (B) and Two-way multivariate analysis of variance (two-way MANOVA) with Tukey post hoc test (D) were used for statistical analysis. Data are expressed as mean  $\pm$  SD; n=5, \* $P$  < 0.05 versus COL; # $P$  < 0.05, versus PGE<sub>2</sub>/COL.



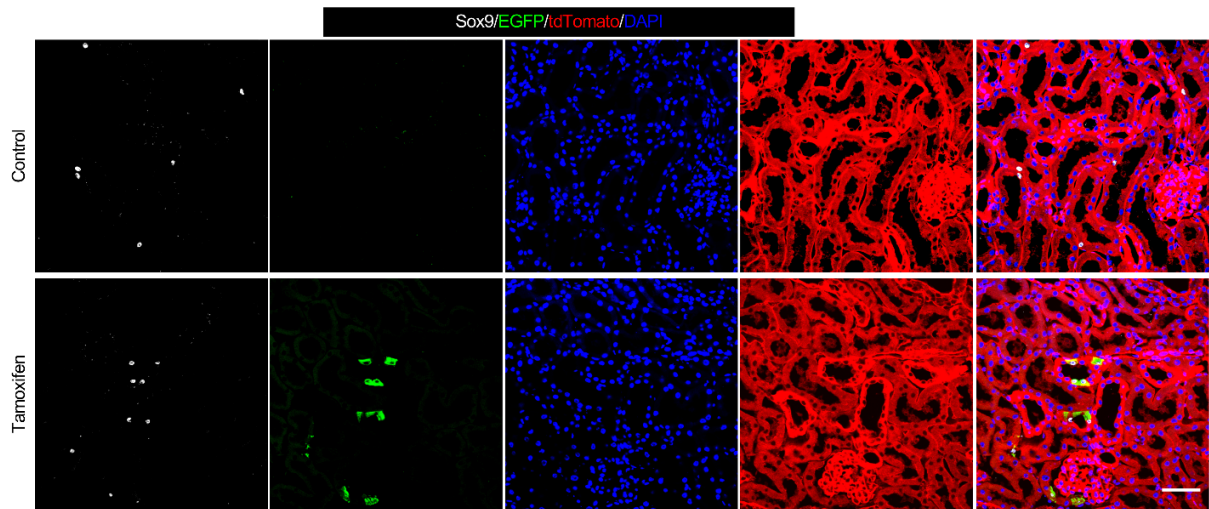

**Figure S5. Validation of the Sox9-Cre<sup>ERT2</sup>; R26<sup>mTmG</sup> mouse genetic model**

To verify the mouse genetic model, tamoxifen (corn oil was used as a control) was injected three times in succession before AKI, and Sox9<sup>+</sup> cells and EGFP fluorescence colocalization in the kidney were detected by anti-Sox9 immunostaining.

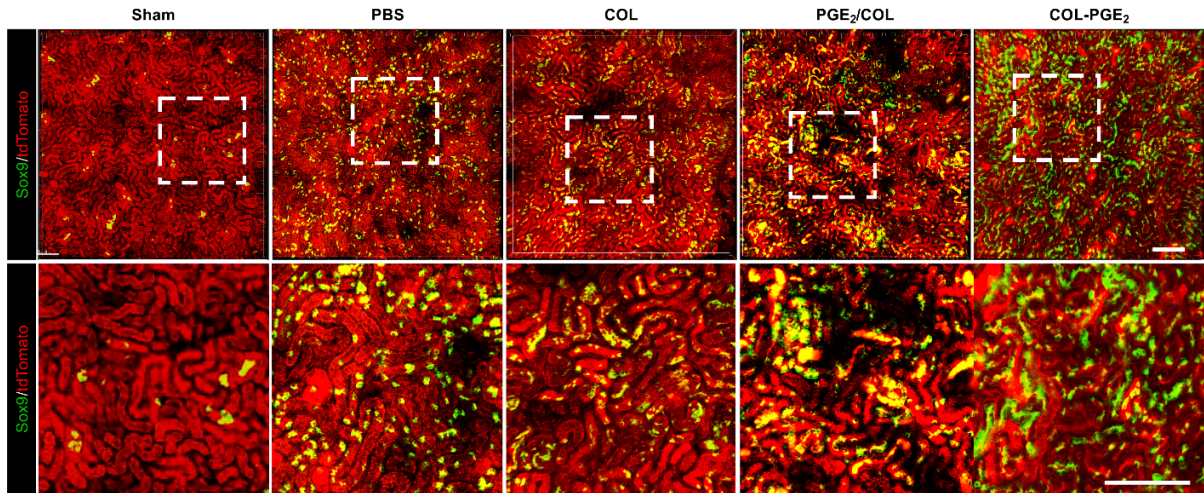

**Figure S6. Two-photon living imaging of Sox9<sup>+</sup> cell expansion following PGE<sub>2</sub> treatment.** Representative images of two-photon intravital tracing showed that Sox9<sup>+</sup> cell-derived cells were abundantly expanded by the administration of COL-PGE<sub>2</sub> matrix on day 7 after AKI. Scale bar, 200  $\mu$ m. See also Video S1-4.

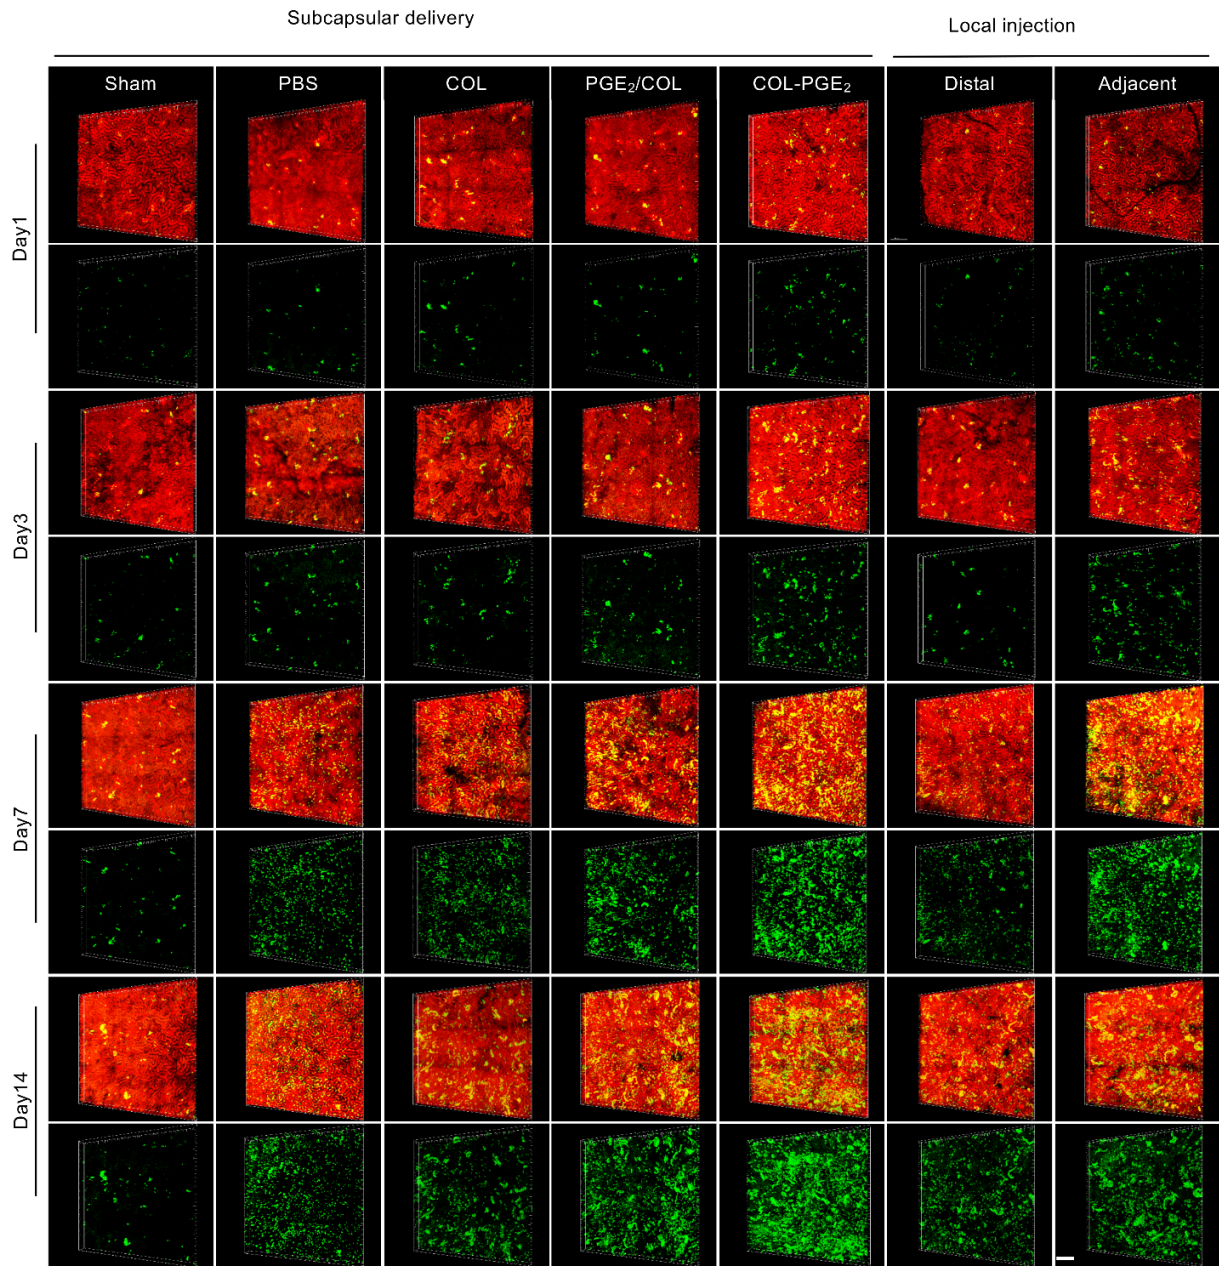

**Figure S7. The COL-PGE2 matrix promoted the formation of functional renal tubules in descendants of Sox9<sup>+</sup> cells.** Representative images of two-photon intravital microscopy showed Sox9<sup>+</sup> derived cells with the administration of PBS, COL, PGE<sub>2</sub>/COL and COL-PGE<sub>2</sub> matrix at different time points after AKI. Scale bar, 200  $\mu$ m.



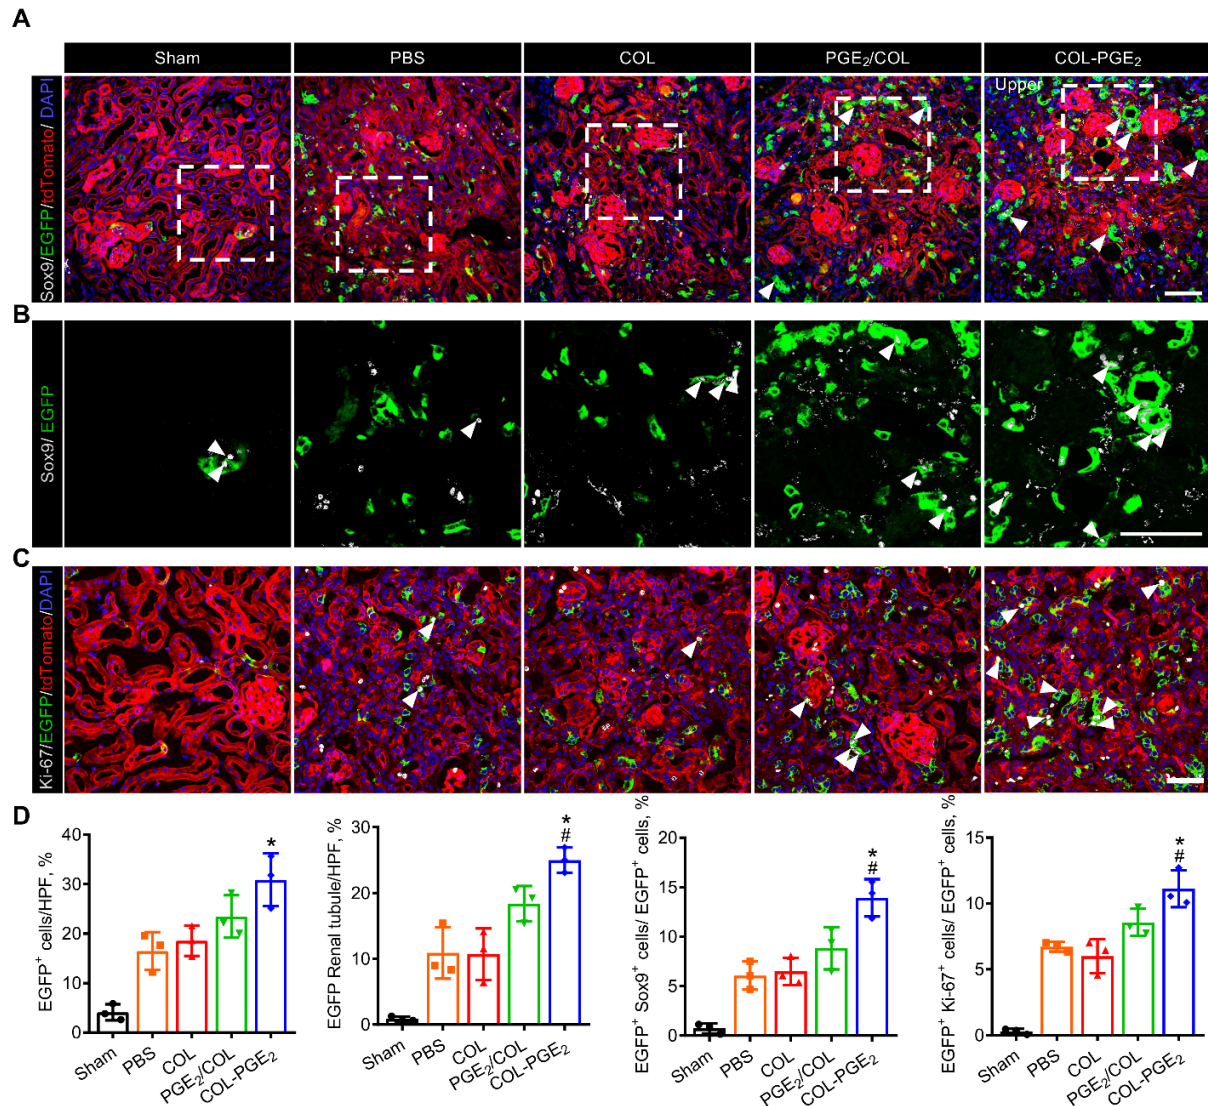

**Figure S8. The COL-PGE<sub>2</sub> matrix results in increased activation of Sox9 expression and Sox9<sup>+</sup> cell proliferation** (A) Confocal images and (B) local zoomed-in images for colocalization analysis of anti-Sox9 immunostaining (gray) and Sox9-Cre<sup>ERT2</sup>-activated EGFP fluorescence in kidneys with the administration of the PBS, COL, PGE<sub>2</sub>/COL and COL-PGE<sub>2</sub> matrix on day 14 post AKI. White arrowheads highlight Sox9-EGFP-labeled cells, and white arrowheads highlight Sox9<sup>+</sup>/EGFP-colabeled cells. Scale bar, 50  $\mu$ m. (C) Confocal images for the colocalization analysis of anti-Ki-67 immunostaining (gray) and Sox9-Cre<sup>ERT2</sup>-activated EGFP fluorescence in kidneys with the administration of PBS, COL, PGE<sub>2</sub>/COL and COL-PGE<sub>2</sub> matrix on day 14 after injury. White arrowheads highlight Ki-67<sup>+</sup>/EGFP colabeled cells. Scale bar, 50  $\mu$ m. (D) Quantification of EGFP<sup>+</sup> cells, EGFP renal tubules, Sox9<sup>+</sup>/EGFP colabeled cells and Ki-67<sup>+</sup>/EGFP colabeled cells in the kidneys of mice on day 14 after delivery of the COL-PGE<sub>2</sub> matrix post AKI. One-way repeated measures ANOVA with a Tukey post hoc tests (D) were used for statistical analysis. Data are expressed as mean  $\pm$  SD; n=3, \**P* < 0.05 versus COL; #*P* < 0.05, versus PGE<sub>2</sub>/COL.

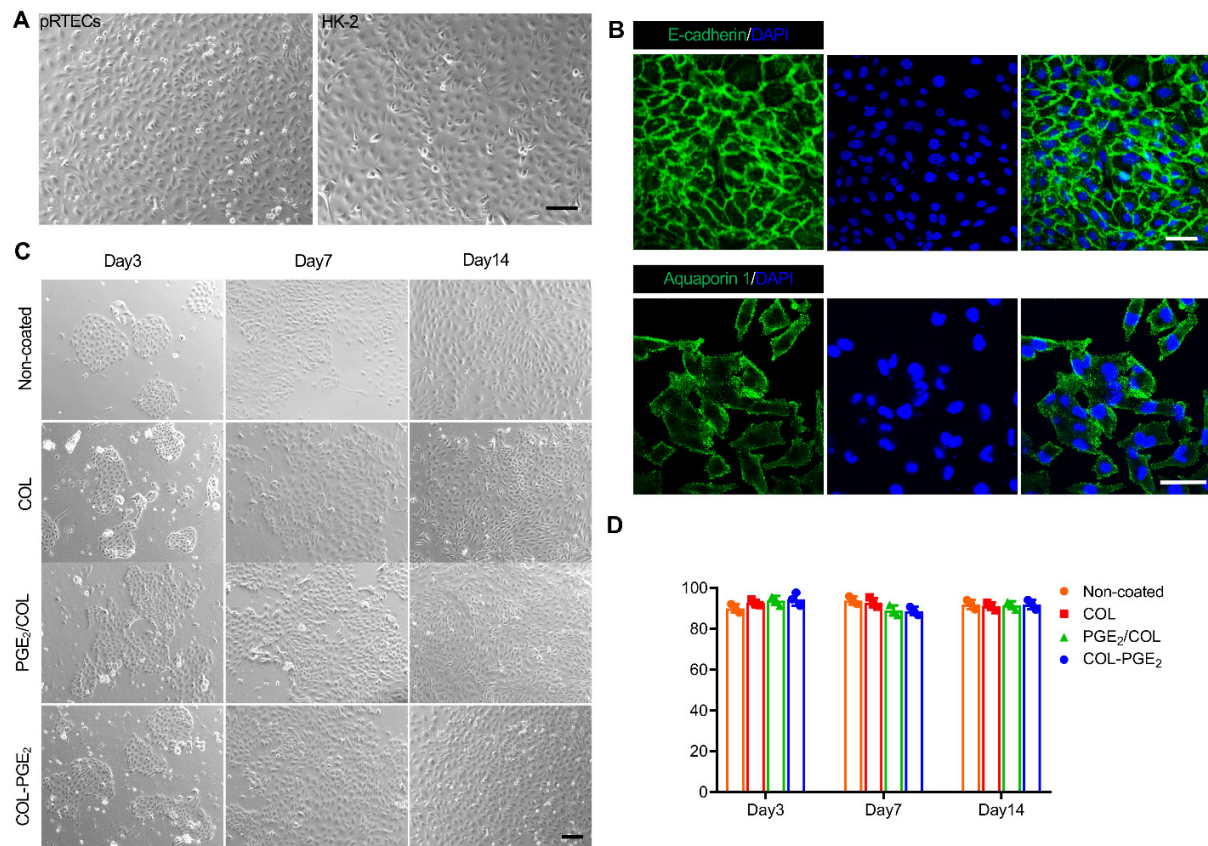

**Figure S9. Renal tubular epithelial cell morphology and matrix biocompatibility.** (A) Comparison of the morphology between isolated primary renal tubular epithelial cells (pRTEC) and HK-2 human renal proximal tubule cells. Scale bar, 100  $\mu$ m. (B) Immunofluorescence staining with antibodies against E-cadherin (top) and Aquaporin-1 (bottom) shows the isolated pRTECs. Scale bar, 50  $\mu$ m. (C) The morphology and colony formation capacity of pRTEC cultured on noncoated or COL, PGE<sub>2</sub>/COL or COL-PGE<sub>2</sub> matrix for 3, 7, and 14 days. Scale bar, 100  $\mu$ m. (D) Quantification of cell viability by trypan blue staining and calculation of the percentage of live cells cultured on noncoated or COL, PGE<sub>2</sub>/COL or COL-PGE<sub>2</sub> matrix-coated plates for 3, 7, and 14 days. Two-way MANOVA with Tukey post hoc test was used for statistical analysis. Data are expressed as mean  $\pm$  SD; All data are representative of three independent experiments and are shown as mean  $\pm$  SD.

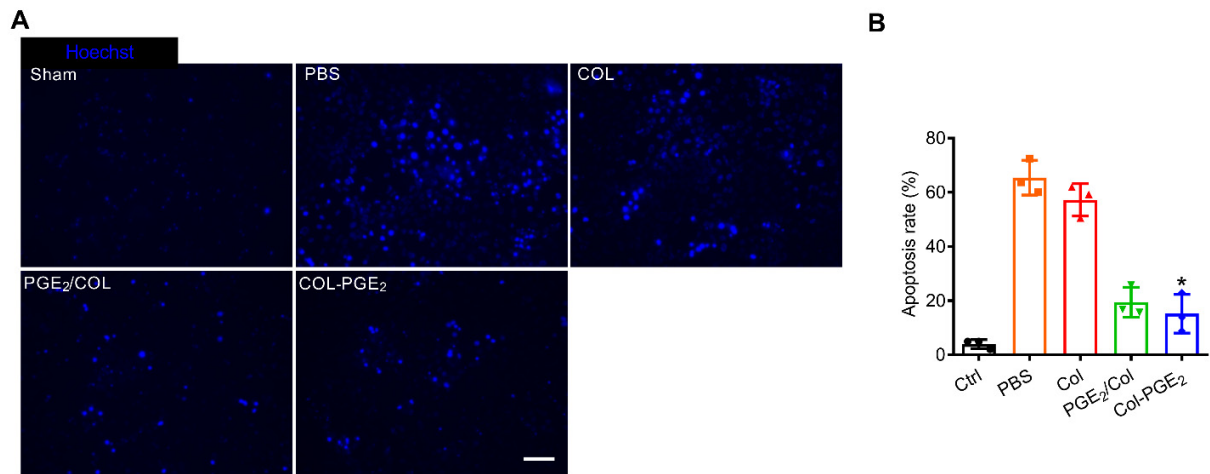

**Figure S10. COL-PGE<sub>2</sub> matrix exerts an anti-apoptosis effect *in vitro*.** (A) Hoechst 33342 staining showed the survival of pRTECs cultured on noncoated, PBS, COL, PGE<sub>2</sub>/COL or COL-PGE<sub>2</sub>-coated plates upon exposure to 150  $\mu$ M H<sub>2</sub>O<sub>2</sub> for 6 h. Scale bar, 100  $\mu$ m. (B) Quantification of the apoptosis index of pRTECs under H<sub>2</sub>O<sub>2</sub>-induced stress. One-way repeated measures ANOVA with a Tukey post hoc test (B) was used for statistical analysis. Data are expressed as mean  $\pm$  SD, n=3, \**P* < 0.05 versus COL.
